# Supplementary material
Source: Springer Nature journal article supplement (https://www.springermedizin.de/resource/supplementary/12967_2014_2111_MOESM4_ESM.pdf/9575048)

|                           | α-CD3 |         | α-IgD |      | α-IgM |       | IFN-α   |         |         |         | IL-2    |         | IL-4    |         | IL-6    |         | IL-27   |         |         |         | PMA   |      | R848  |        |
|---------------------------|-------|---------|-------|------|-------|-------|---------|---------|---------|---------|---------|---------|---------|---------|---------|---------|---------|---------|---------|---------|-------|------|-------|--------|
|                           | p-Erk | p-ZAP70 | p-Erk | p-S6 | p-Erk | p-Syk | p-Stat1 | p-Stat3 | p-Stat5 | p-Stat6 | p-Stat5 | p-Stat6 | p-Stat5 | p-Stat6 | p-Stat1 | p-Stat3 | p-Stat1 | p-Stat3 | p-Stat5 | p-Stat6 | p-Erk | p-S6 | p-Erk | p-NFκB |
| Monocytes                 |       |         |       |      |       |       |         |         |         |         |         |         |         |         |         |         |         |         |         |         |       |      |       |        |
| B cells                   |       |         |       |      |       |       |         |         |         |         |         |         |         |         |         |         |         |         |         |         |       |      |       |        |
| CD3-CD20- Lymphocytes     |       |         |       |      |       |       |         |         |         |         |         |         |         |         |         |         |         |         |         |         |       |      |       |        |
| CD45RA- cytotoxic T cells |       |         |       |      |       |       |         |         |         |         |         |         |         |         |         |         |         |         |         |         |       |      |       |        |
| CD45RA+ cytotoxic T cells |       |         |       |      |       |       | *       |         | *       |         |         |         | *       | *       | *       | *       | *       |         | *       |         |       | #    |       |        |
| CD45RA- Th cells          |       |         |       |      |       |       |         |         |         |         |         |         |         |         |         |         |         |         |         |         |       |      |       |        |
| CD45RA+ Th cells          |       |         |       |      |       |       |         |         | *       |         | *       |         |         |         |         |         |         |         |         |         |       |      |       |        |

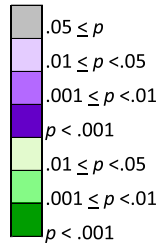

Supplement: MOESM4 [file 9575048]
